# Supplementary material
Source: Springer Nature journal article supplement (https://www.springermedizin.de/resource/supplementary/12865_2013_567_MOESM2_ESM.pdf/9428300)

CD11b+ CD11c-

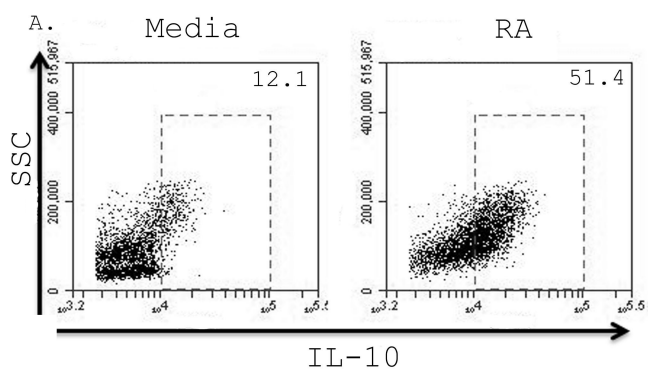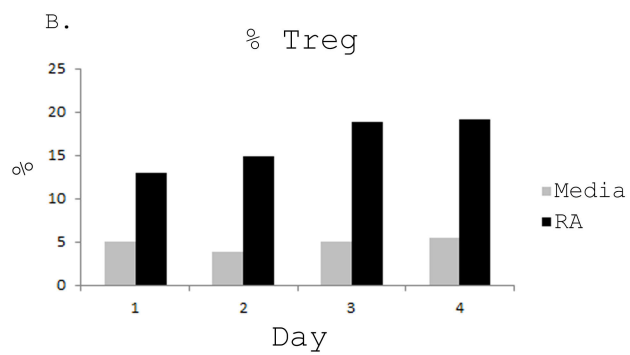

Supplement: MOESM2 [file 9428300]
